# Supplementary material
Source: publisher figshare collection journal article supplement (https://gsajournals.figshare.com/articles/dataset/_/7825712)
Supplement: Supplementary file 1 [file 2]

## Sheet: Sheet1
List of primers used for genotyping
Gene		Sequence
ogr-2	Forward	5'-GCGAACAGGTGTGCTCCTTTAAAG-3'
	Reverse	5'-CAAGGAAGTATCCGACGTTAAAGCG-3'
lip-1	Forward	5'-AACTCACCTACCGAGCACAT-3'
	Reverse	5'-GGCGACGACAATGGAAGATG-3'
cep-1	Forward	5'-CAATACTACTGCACAGATGGAACCA-3'
	Reverse	5'-TGGTGGAGTTCTGTGCATCATT-3'
syp-1	Forward	5'-GCAATCTGCAAATTTGCGCC-3'
	Reverse	5'-GTTTCTGCTTGGCTGCCATG-3'
hus-1	Forward	5'-GCGGCAATCGACGTGTTTATCA-3'
	Reverse	5'-CCTGATGTACTGGCTGTGAGC-3'
mpk-1	Forward	5'-ACAATGGCCGATTACTGAGC-3'
	Reverse	5'-GTTCAATTCAGGGGTGAGGA-3'
ogr-2 3XFLAG	Forward	5'-GTTTCAAGAAGGCATGGTATCG-3'
	Reverse	5'-CGACCCGAAGAATTGACATTG-3'
